# Supplementary material for: Kinematics of flight and the relationship to the vortex wake of a Pallas' long tongued bat (Glossophaga soricina)
Source: Oxford University Press journal article supplement (doi:10.1242/jeb.029777), 2010-05-28
Supplement: jeb029777-sup-029777tables1.pdf [file jeb029777-sup-029777tables1.pdf]

Table S1. Location of the digitalized kinematic points

| Coordinate number | Placing                                                         |
|-------------------|-----------------------------------------------------------------|
| 1                 | The neckline, thinnest part of the neck, location of the collar |
| 2                 | Shoulder, here the point of attachment of the membrane          |
| 3                 | Elbow                                                           |
| 4                 | Wrist at the base of the thumb                                  |
| 5                 | Wingtip                                                         |
| 6                 | 4th digit                                                       |
| 7                 | 5th digit                                                       |
| 8                 | Foot, here the point of attachment of the membrane              |
| 9                 | Leg, the joint between the leg and the body                     |
