# Supplementary material for: Kinematics of flight and the relationship to the vortex wake of a Pallas' long tongued bat (Glossophaga soricina)
Source: Oxford University Press journal article supplement (doi:10.1242/jeb.029777), 2010-05-28
Supplement: jeb029777-sup-029777tables2.pdf [file jeb029777-sup-029777tables2.pdf]

Table S2. Coordinates for the triangles used for angle of attack calculations

| Triangle number | Points used |
|-----------------|-------------|
| 1               | 4, 5, 6     |
| 2               | 4, 6, 7     |
| 3               | 4, 5, 7     |
| 4               | 3, 4, 7     |
| 5               | 2, 3, 9     |
| 6               | 2, 3, 4     |
| 7               | 2, 7, 9     |
| 8               | 2, 4, 7     |
| 9               | 2, 4, 9     |

Triangles 1, 2, 3, triangles 4 and 8 and triangles 7 and 9 displayed comparable patterns. Triangles 5 and 6 also showed similar behaviour.
